# Supplementary material for: Understanding the dynamics in distribution of invasive alien plant species under predicted climate change in Western Himalaya
Source: PubMed Central journal article supplement (PMC5903596; doi:10.1371/journal.pone.0195752), 2018-04-17

IAPS

Present

Year2050 (RCP 2.6)

Year2050 (RCP 8.5)

Year2070 (RCP 2.6)

Year2070 (RCP 8.5)

*Ageratina adenophora*

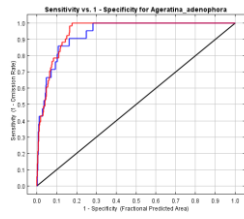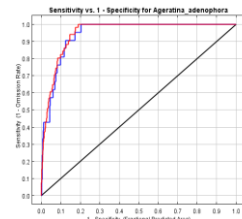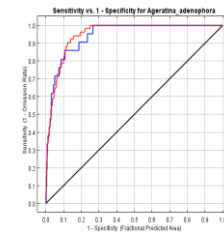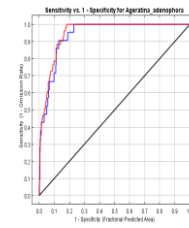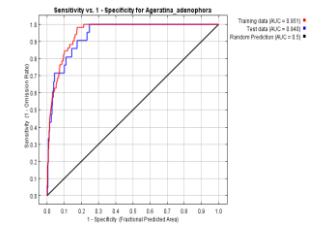

*Ageratum conyzoides*

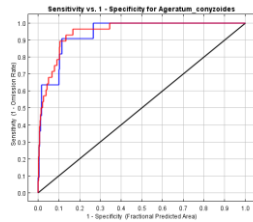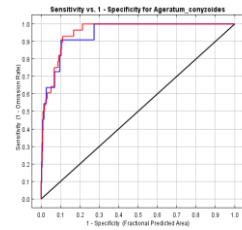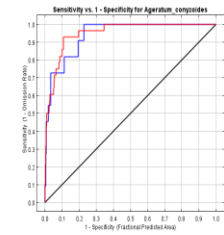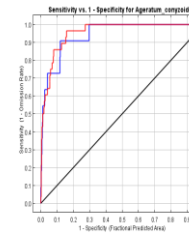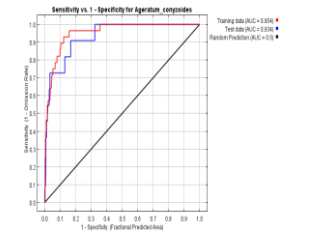

*Ageratum haustonianum*

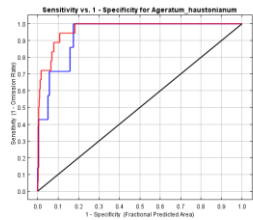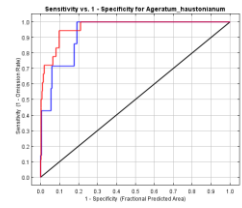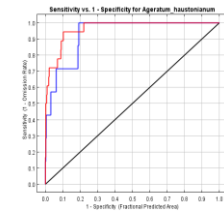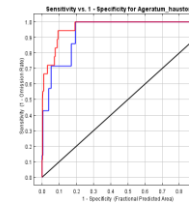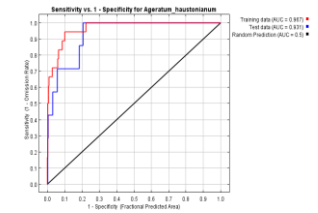

*Amaranthus spinosus*

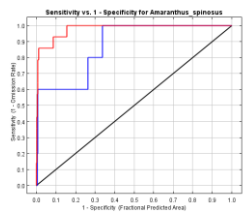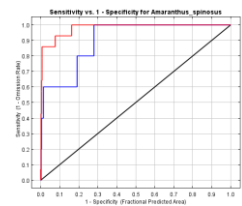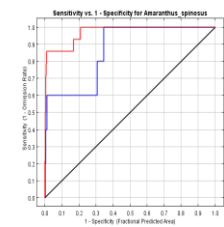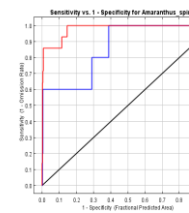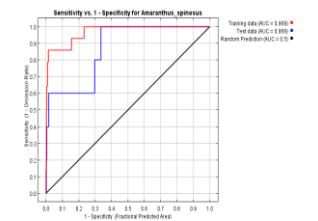

# IAPS

*Bidens pilosa*

## Present

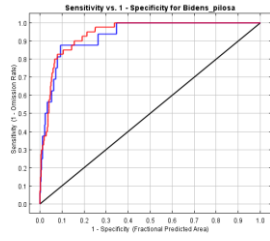

## Year2050 (RCP 2.6)

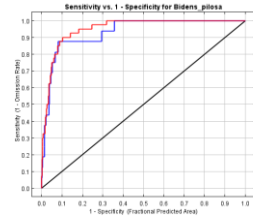

## Year2050 (RCP 8.5)

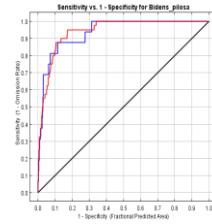

## Year2070 (RCP 2.6)

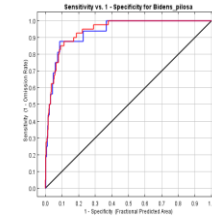

## Year2070 (RCP 8.5)

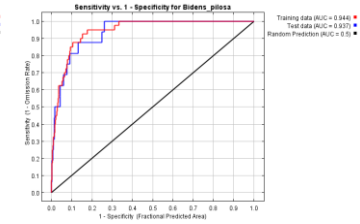

*Erigeron karvinskianus*

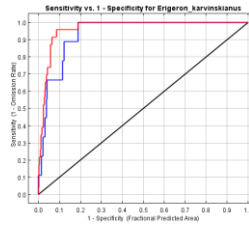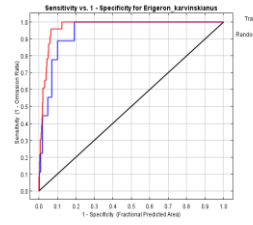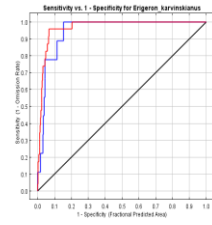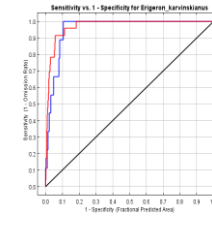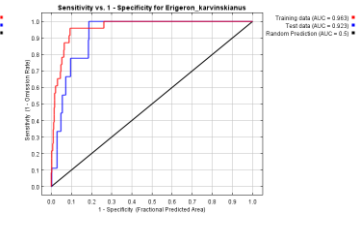

*Lantana camara*

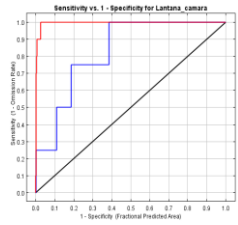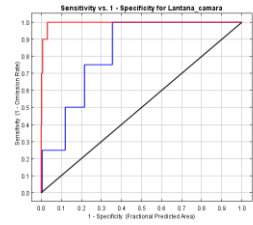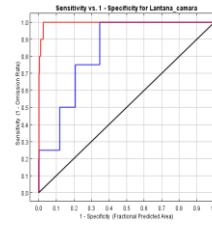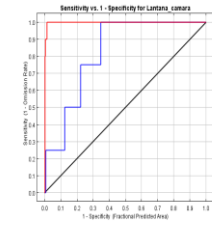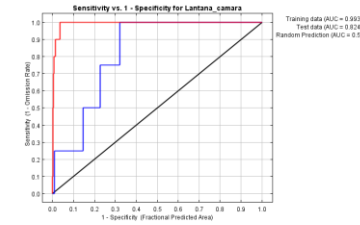

*Parthenium hysterophorus*

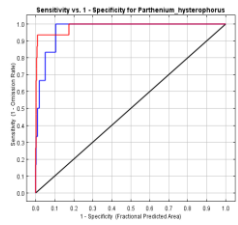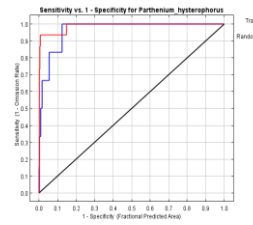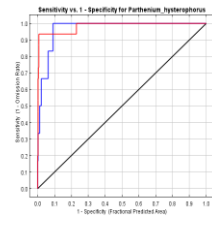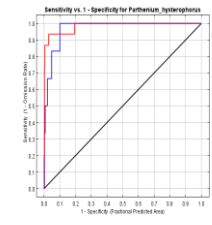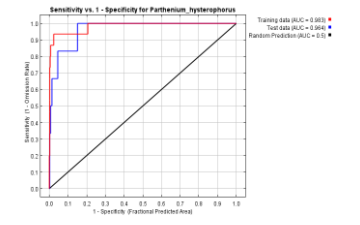

IAPS

Present

Year2050 (RCP 2.6)

Year2050 (RCP 8.5)

Year2070 (RCP 2.6)

Year2070 (RCP 8.5)

*Senna occidentalis*

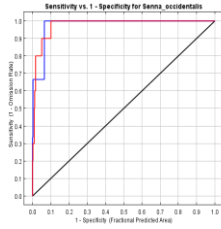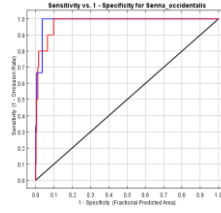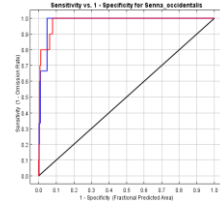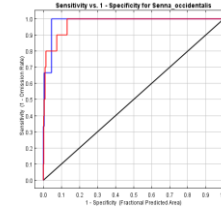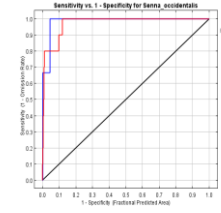

*Senna tora*

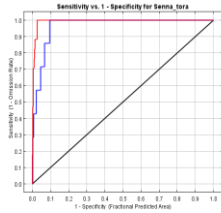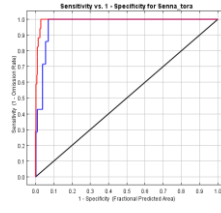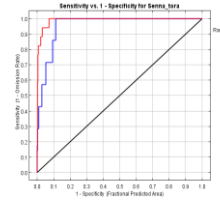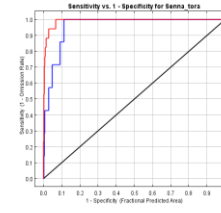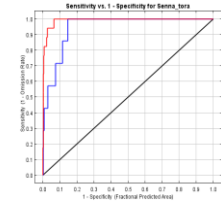

*Xanthium strumarium*

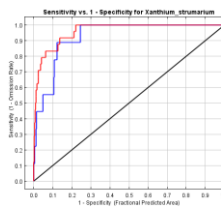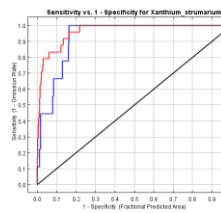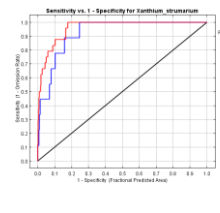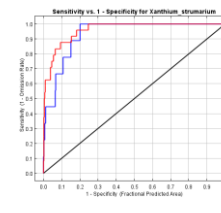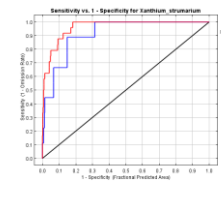

Supplement: pone.0195752.s002.pdf [file pone.0195752.s002.pdf]
