# Supplementary material for: Understanding the dynamics in distribution of invasive alien plant species under predicted climate change in Western Himalaya
Source: PubMed Central journal article supplement (PMC5903596; doi:10.1371/journal.pone.0195752), 2018-04-17

**S3 Figure: Predicted range expansion and contraction of IAPS for the year 2050 & 2070 at different climatic scenario**

| Species Name | Year 2050 ( R.C.P. 2.6) | Year 2050 (R.C.P. 8.5) | Year 2070(R.C.P. 2.6) | Year 2070 (R.C.P.8.5) |
|--------------|-------------------------|------------------------|-----------------------|-----------------------|
|--------------|-------------------------|------------------------|-----------------------|-----------------------|

*Ageratina adenophora* L.

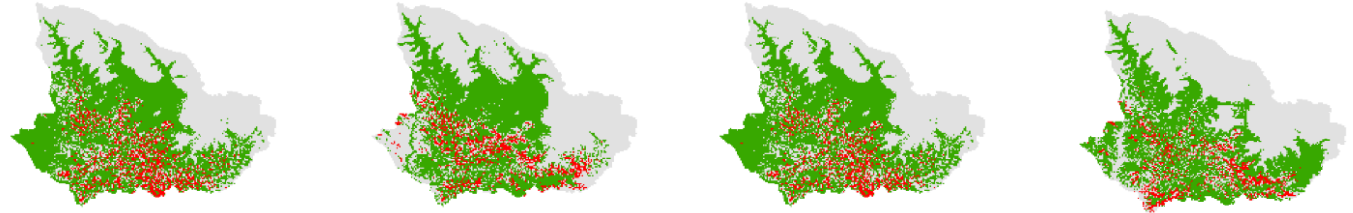

*Ageratum conyzoides* L.

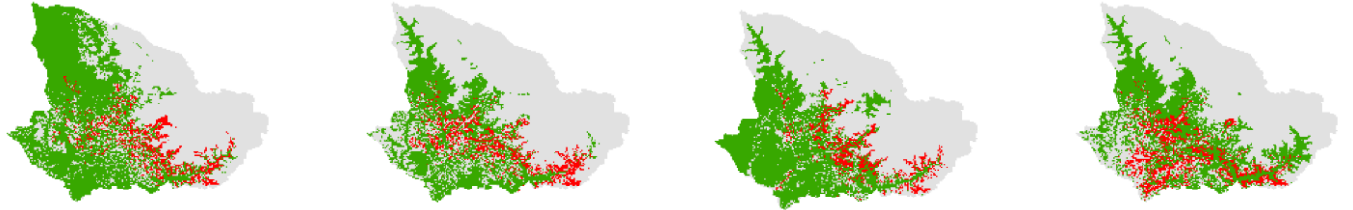

*Ageratum houstonianum* Mill.

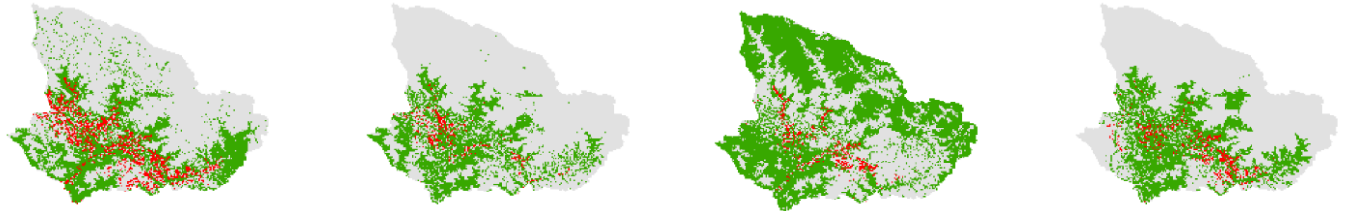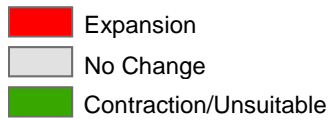

**Species Name**

**Year 2050 ( R.C.P. 2.6)**

**Year 2050 (R.C.P. 8.5)**

**Year 2070 (R.C.P. 2.6)**

**Year 2070 (R.C.P.8.5)**

*Amaranthus spinosus L.*

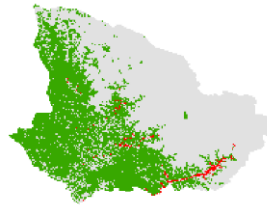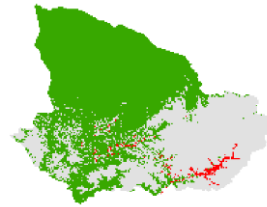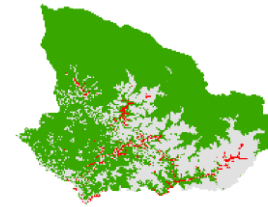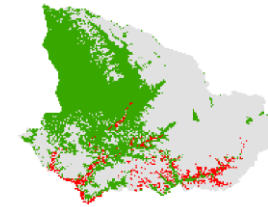

*Bidens pilosa L.*

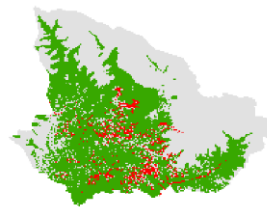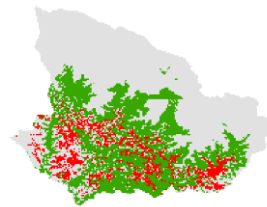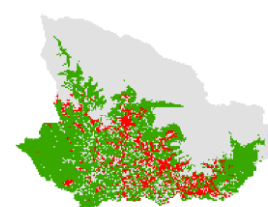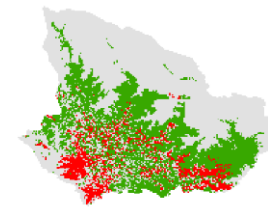

*Erigeron karvinskianus DC.*

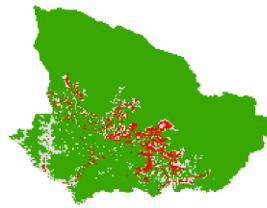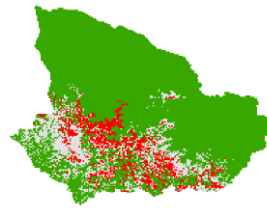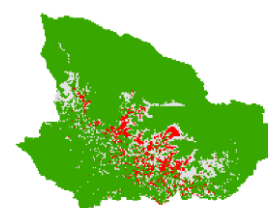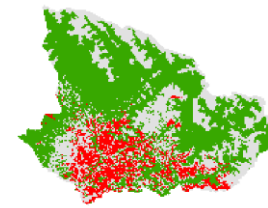

*Lantana camara L.*

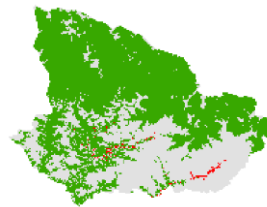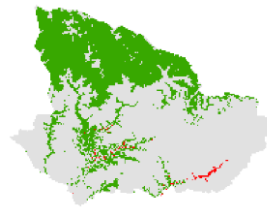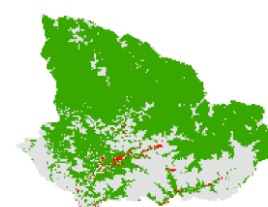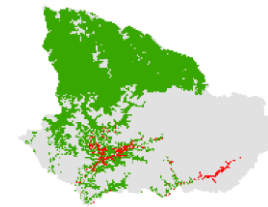

**Species Name**

**Year 2050 ( R.C.P. 2.6)**

**Year 2050 (R.C.P. 8.5)**

**Year 2070 (R.C.P. 2.6)**

**Year 2070 (R.C.P.8.5)**

*Parthenium hysterophorus* L.

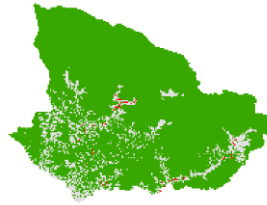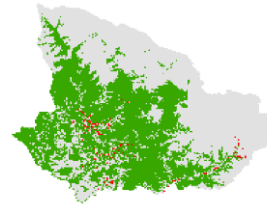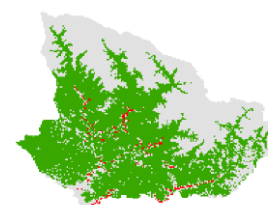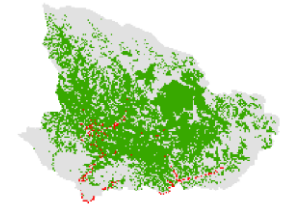

*Senna occidentalis* (L.) Link

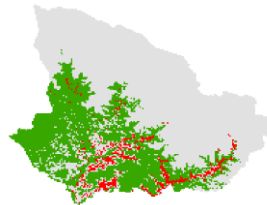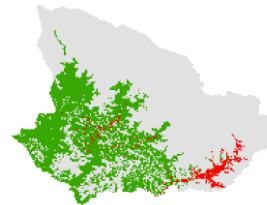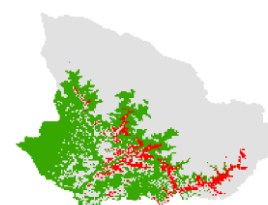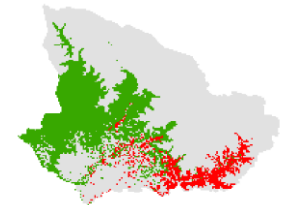

*Senna tora* (L.) Roxb

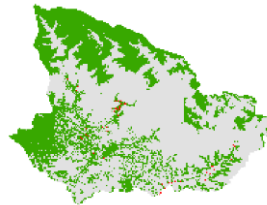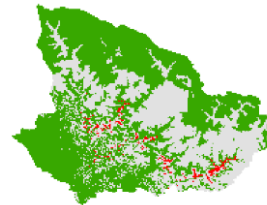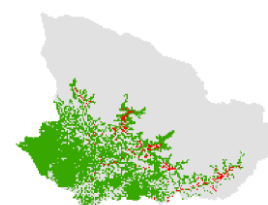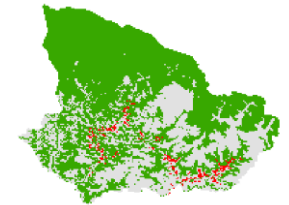

*Xanthium strumarium* L.

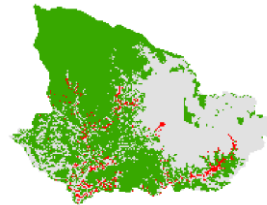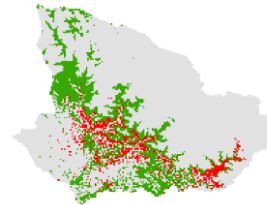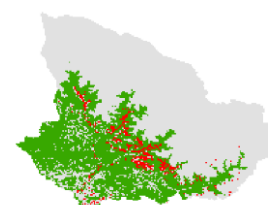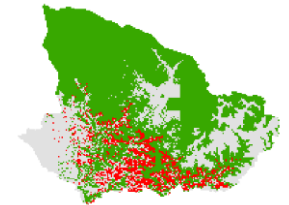

Supplement: pone.0195752.s003.pdf [file pone.0195752.s003.pdf]
